# Supplementary figures and images for: Smoking cessation in adults with diabetes: a systematic review and meta-analysis of data from randomised controlled trials
Source: HighWire-hosted journal article supplement (doi:10.1136/bmjopen-2013-004107), 2014-03-01

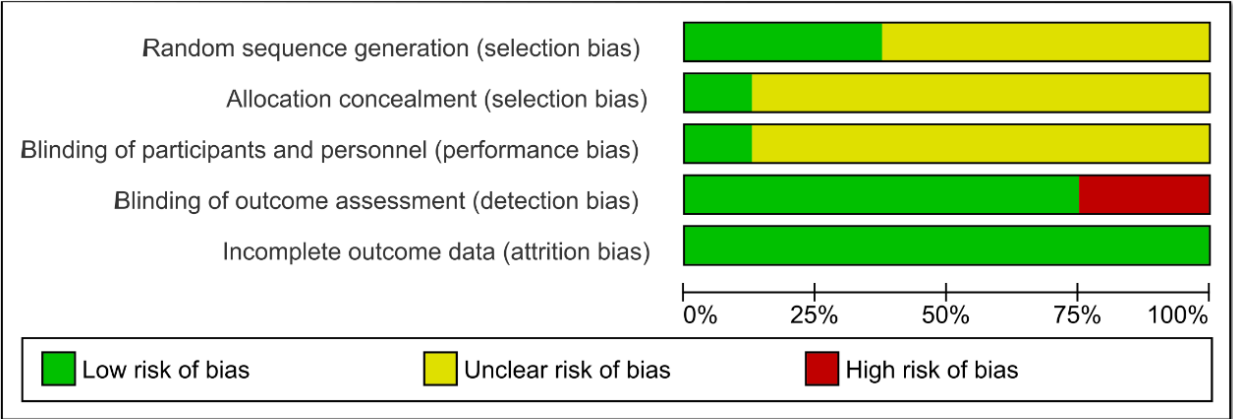

Supplement: bmjopen-2013-004107supp_appendix4.pdf [file bmjopen-2013-004107supp_appendix4.pdf]
